# Supplementary material
Source: PubMed Central journal article supplement (PMC2494909)

Supplementary Fig. 1. Structure-based multiple sequence alignment of SepRS enzymes. Strictly conserved residues are shown highlighted in red, highly conserved residues are shown in light blue. The secondary structure of *A. fulgidus* SepRS, as determined from the crystal structure, is shown below the alignment. The conserved active site motifs in class II tRNA synthetases are shown in green.

# SUPPLEMENTARY FIGURE 1

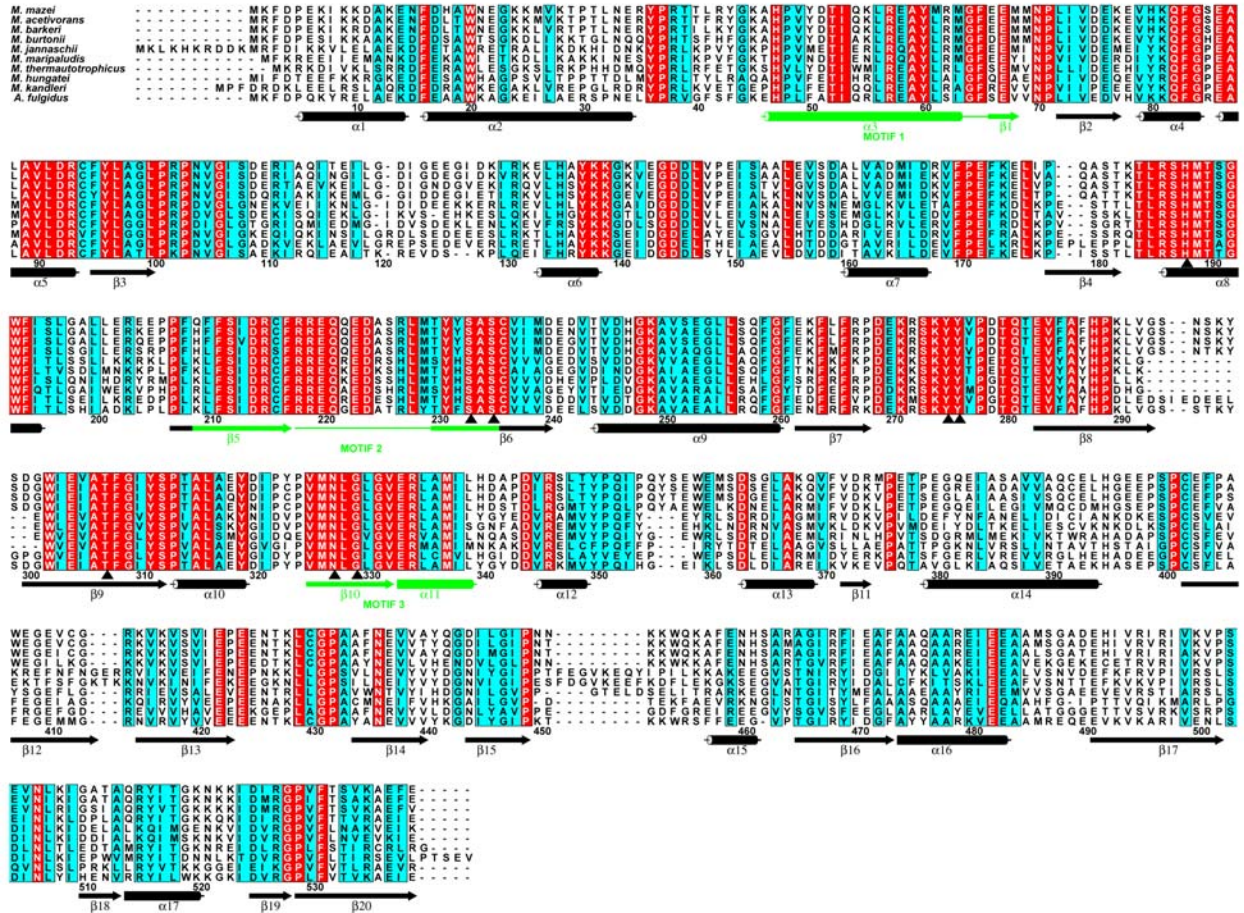

Supplement: M801838200_1.pdf [file M801838200_1.pdf]
